# Supplementary material for: Red fluorescent carbon nanoparticles derived from Spinacia oleracea L.: a versatile tool for bioimaging and biomedical applications
Source: Royal Society of Chemistry journal article supplement (doi:10.1039/d3ma00273j), 2023-01-01
Supplement: d3ma00273j1.pdf [file d3ma00273j1.pdf]

## **Red Fluorescent Carbon Nanoparticles Derived from *Spinacia oleracea* L.: A Versatile Tool for Bioimaging & Biomedical Applications**

Ketki Barve<sup>1#</sup>, Udisha Singh<sup>2#</sup>, Pankaj Yadav<sup>2#</sup>, Krupa Kansara<sup>3</sup>, Payal Vaswani<sup>2</sup>,  
Ashutosh Kumar<sup>3</sup> and Dhiraj Bhatia<sup>2\*</sup>

<sup>1</sup> Dr. D. Y. Patil Biotechnology and Bioinformatics Institute, Dr. D. Y. Patil Vidyapeeth, Pune, Maharashtra, 411018, India

<sup>2</sup> Biological Engineering Discipline, Indian Institute of Technology Gandhinagar, Palaj, Gujarat 382355, India

<sup>3</sup> Department of Biochemistry and Forensic Sciences, Gujarat University, Navrangpura, Ahmedabad 380009, India

\*Corresponding Author – [dhiraj.bhatia@iitgn.ac.in](mailto:dhiraj.bhatia@iitgn.ac.in)

# Indicates Authors contributed equally

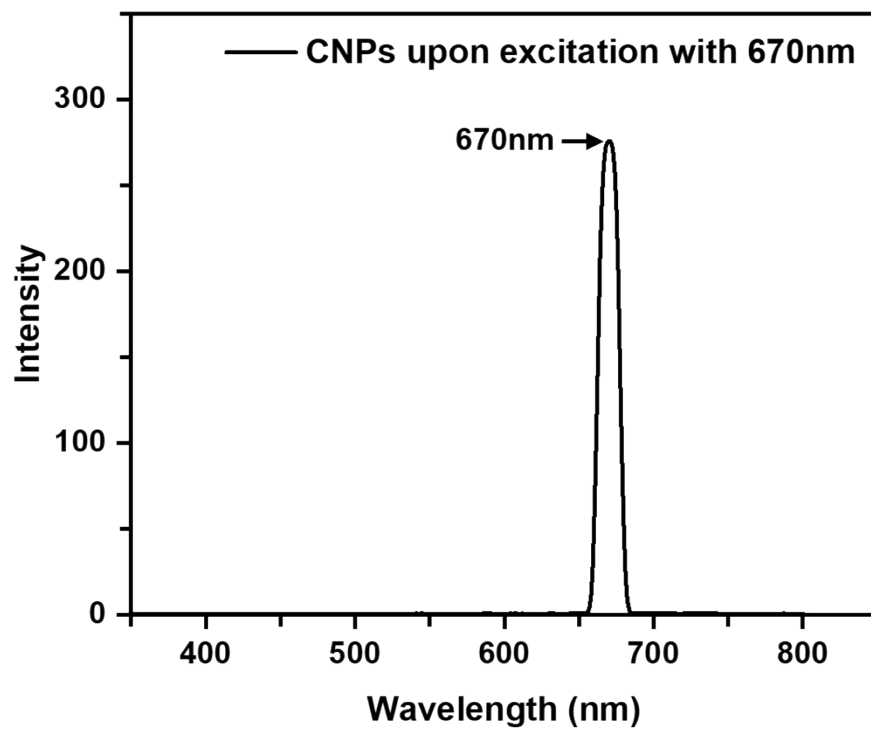

Figure S1: The fluorescence spectra of CNPS upon excitation with 670nm wavelength.

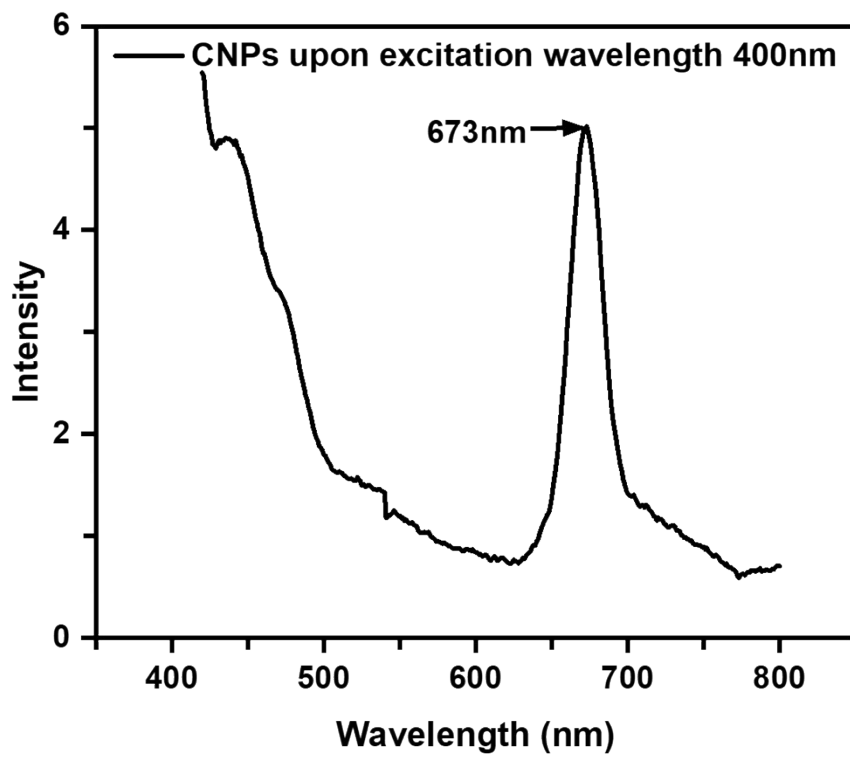

Figure S2: The fluorescence spectra of CNPS upon excitation with 400nm wavelength.

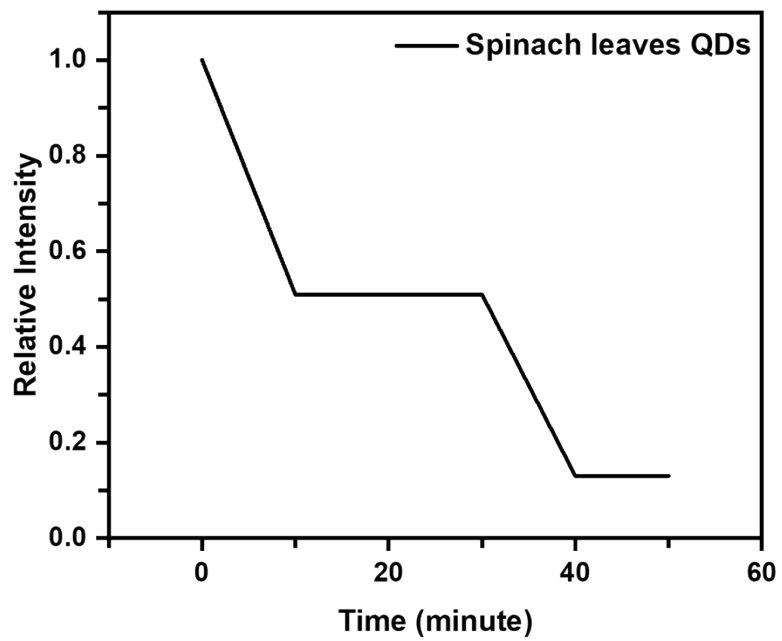

Figure S3: The Photostability of CNPS upon excitation with 400nm wavelength.
